# Supplementary material
Source: publisher site journal article supplement (https://www.dovepress.com/article/254950)

**Figure S1 Lnc712 overexpression induced tumorigenesis in normal hepatic cells by regulating miR-142-3p.** Normal hepatic cell line HL-7702 was transfected with Lnc712 expression vector and miR-142-3p mimic. Cell proliferation (A), migration (B), invasion (C), cell cycle (D) and protein levels of c-myc and Bach-1 (E) were detected by CCK-8 assay, transwell assay, wound healing assay, flow cytometry and western blotting, respectively. *, p<0.05.


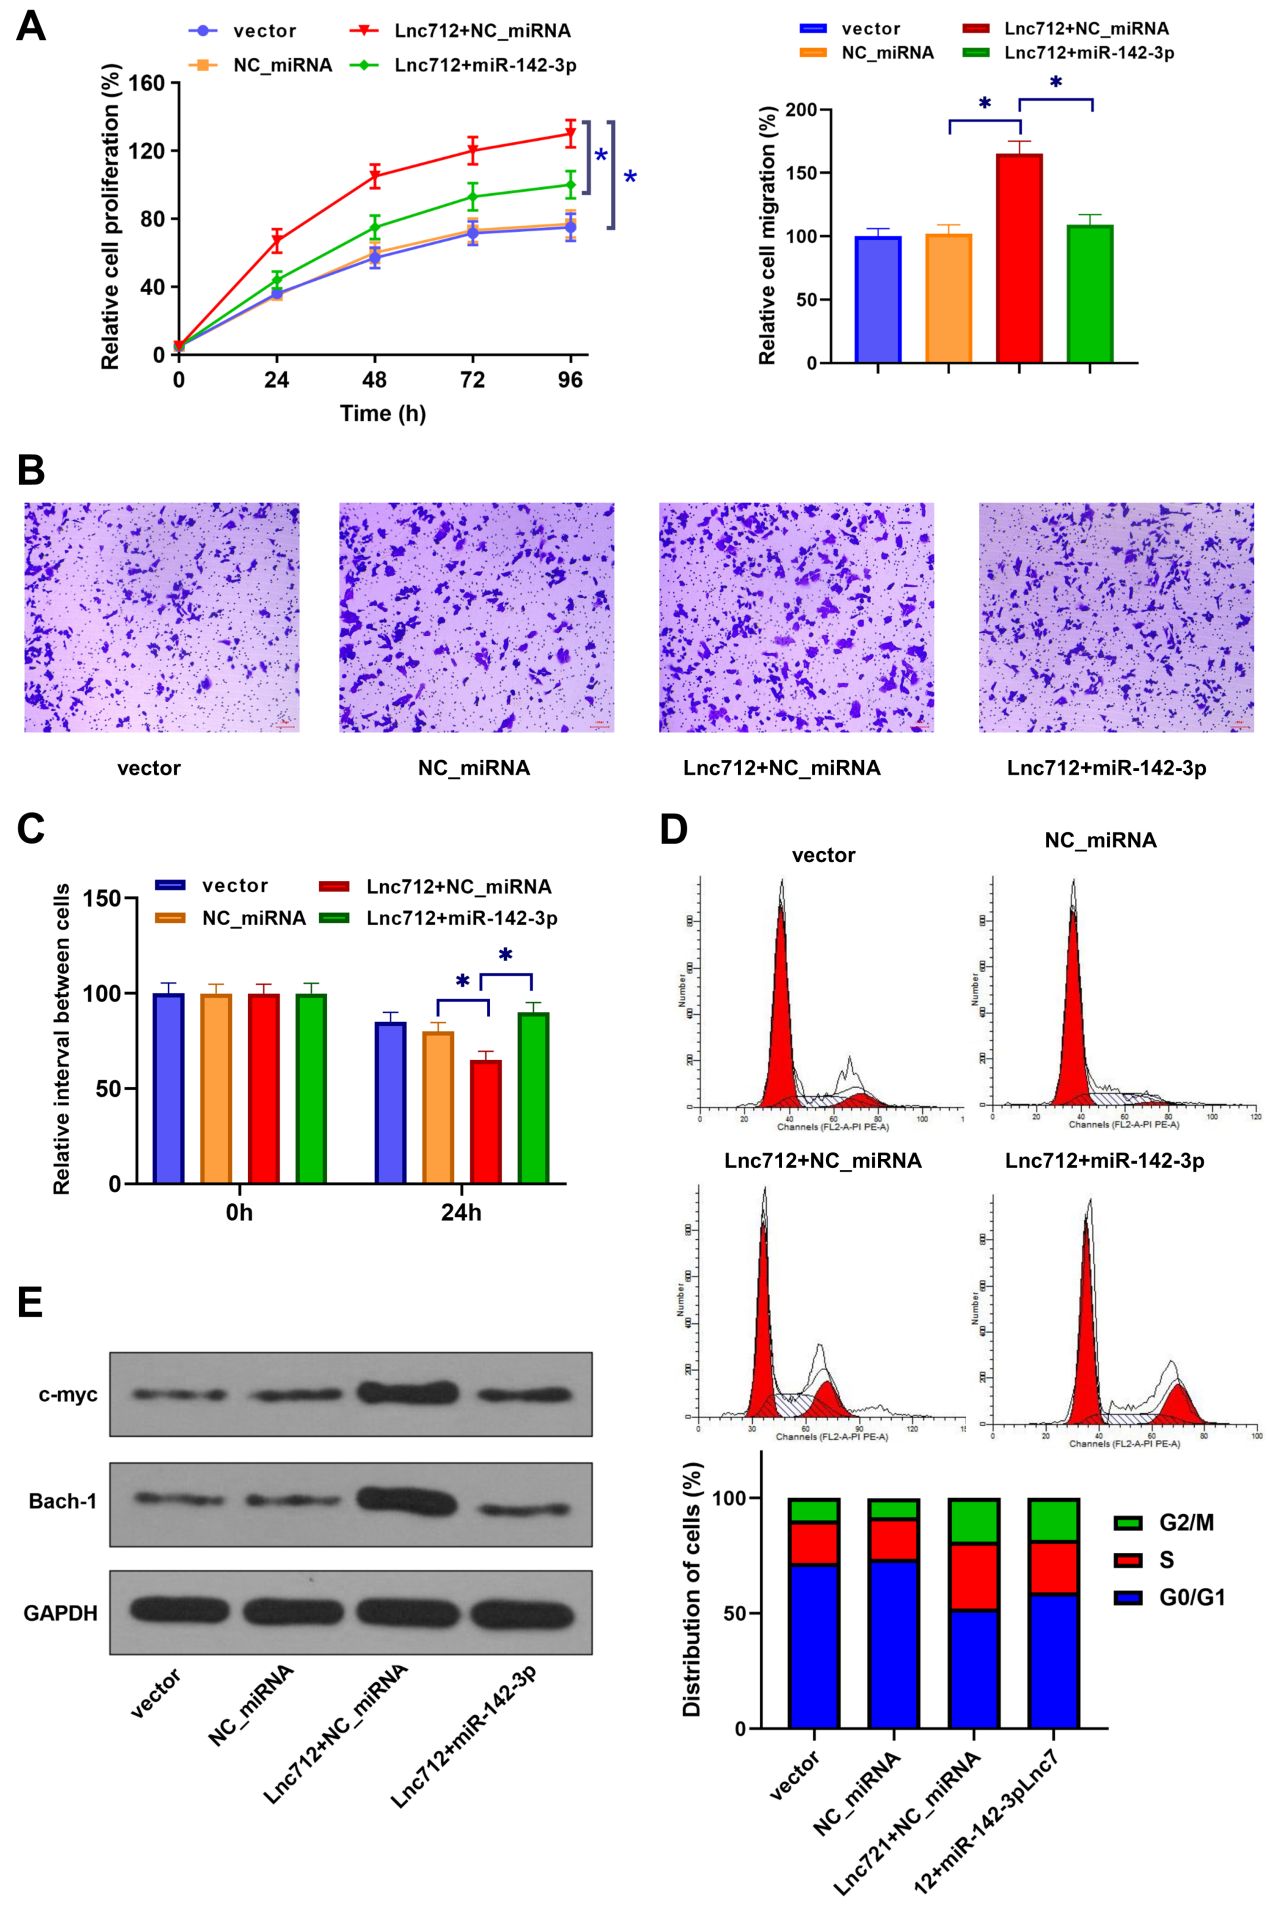

Supplement: Supplementary file 1 [file get_supplementary_file.php]
